merular filtration and tubular reabsorption of sodium under these conditions. Maintenance of the latter in the presence of a progressive decrease in arterial pressure must, in some part, be attributed to reduction in renal vascular resistance and preservation of total renal blood flow rates.

The findings of the present study confirm and, in ways previously discussed, augment those of Deutsch and associates,<sup>6</sup> who determined the effects of halothane on renal function in normal man. These investigators were necessarily limited, as were we to some extent, to the use of indirect clearance methods for measurement of renal function, which necessitated the administration of acute and maintaining water loads sufficient to result in a satisfactory urinary output. As they and we found, this is particularly difficult during halothane anesthesia due to an associated antidiuretic response which results in elimination of small volumes of hyperosmolar urine and osmolar clearances that are positive and water clearances that are negative. The basis for the occurrence of this with halothane has not been established but may include, as Deutsch and co-workers<sup>6</sup> infer, the release of antidiuretic hormone.

### References

1. Theye RA: Effect of halothane on canine gastrocnemius-muscle oxygen consumption. *Anesth Analg (Cleveland)* 49:680, 1970
2. Pitts RF: Physiology of the Kidney and Body Fluids: An Introductory Text. Chicago, Year Book Medical Publishers, Inc., 1963, 243 pp
3. Smith HW: The Kidney: Structure and Function in Health and Disease. New York, Oxford University Press, 1951, 1049 pp
4. Maher FT, Tauxe WN: Renal clearance in man of pharmaceuticals containing radioactive iodine. *JAMA* 207:97, 1969
5. Theye RA: Calculation of blood O<sub>2</sub> content from optically determined Hb and HbO<sub>2</sub>. *ANESTHESIOLOGY* 33:653, 1970
6. Deutsch S, Goldberg M, Stephen GW, et al.: Effects of halothane anesthesia on renal function in normal man. *ANESTHESIOLOGY* 27:793, 1966
7. Theye RA: Myocardial and total oxygen consumption with halothane. *ANESTHESIOLOGY* 28:1042, 1967
8. Theye RA, Michenfelder JD: The effect of halothane on canine cerebral metabolism. *ANESTHESIOLOGY* 29:1113, 1968
9. Hess Thaysen J, Lassen NA, Munck O: Sodium transport and oxygen consumption in the mammalian kidney (abstract). *Excerpta Medica International Congress Series* no. 29, 1960, p. 44
10. Kramer K, Deetjen P: Beziehungen des O<sub>2</sub>-Verbrauchs der Niere zu Durchblutung und Glomerulus-filtrat bei Änderung des arteriellen Druckes. *Arch Ges Physiol* 271:782, 1960
11. Lassen NA, Munck O, Hess Thaysen J: Oxygen consumption and sodium reabsorption in the kidney. *Acta Physiol Scand* 51:371, 1961
12. Knox FG, Fleming JS, Rennie DW: Effects of osmotic diuresis on sodium reabsorption and oxygen consumption of kidney. *Amer J Physiol* 210:751, 1966

### Drugs

**PANCURONIUM** Pancuronium bromide, first synthesized in 1964 by C. L. Hewitt and D. S. Savage, is a bisquaternary amino steroid. Buckett and Bonta, in 1966, demonstrated its neuromuscular blocking properties in animals. In 1967, Baird and Reid, in a pilot study, showed that in man the drug produced a nondepolarizing neuromuscular block with a potency five times that of tubocurarine. The durations of action of the two drugs appeared to be similar. Experience with pancuronium suggests that it is a useful nondepolarizing myoneural blocker with few side-effects. The absence of adverse cardiovascular effects makes the drug particularly valuable for poor-risk patients. Unfortunately, however, this fact has perhaps led some anesthetists into giving larger doses of pancuronium than are necessary. It would seem that the potency of this drug relative to tubocurarine may increase with increasing dosage, and that in the normally accepted dose range, pancuronium is five to six times as potent as tubocurarine. (Baird, W. L. M.: *Clinical Experience with Pancuronium*, *Proc. Roy. Soc. Med.* 63: 697 (July) 1970.)
